# Supplementary material for: Basicity of carboxylic acids: resonance in the cation and substituent effects
Source: Royal Society of Chemistry journal article supplement (doi:10.1039/b411039k), 2004-12-02
Supplement: b411039k.pdf [file b411039k.pdf]

## Supporting Information

**Table S1** Calculated energies of substituted ketones CH<sub>3</sub>COX, their protonated forms and some reference compounds <sup>a</sup>

|          | Substituent<br>X               | CH <sub>3</sub> COX <b>8a-e</b><br><i>E</i> (DFT) a. u. | CH <sub>3</sub> COH <sup>+</sup> X<br><i>E</i> (DFT) a. u. | Rel. basicity kJ mol <sup>-1</sup> |                                | $\Delta_{10}E$<br>kJ mol <sup>-1</sup> | $\Delta_{11}E$<br>kJ mol <sup>-1</sup> |
|----------|--------------------------------|---------------------------------------------------------|------------------------------------------------------------|------------------------------------|--------------------------------|----------------------------------------|----------------------------------------|
|          |                                |                                                         |                                                            | $\Delta_9E$                        | $\Delta_9G^\circ$ <sup>b</sup> |                                        |                                        |
| <b>a</b> | CH <sub>3</sub>                | -193.2256836                                            | -193.5491603                                               | 0                                  | 0                              | 0                                      |                                        |
| <b>b</b> | CH <sub>2</sub> F <sup>c</sup> | -292.4883451                                            | -292.7948322                                               | 44.6                               |                                | 13.6                                   | 58.2                                   |
| <b>c</b> | CF <sub>3</sub>                | -491.0415959                                            | -491.3302051 ( <i>Z</i> )<br>-491.3257692 ( <i>E</i> )     | 91.5                               | 90.1                           | 51.1                                   | 142.6                                  |
| <b>d</b> | CN                             | -246.1474231                                            | -246.4312621 ( <i>Z</i> )<br>-246.4295083 ( <i>E</i> )     | 104.1                              |                                | 45.4                                   | 149.5                                  |
| <b>e</b> | NO <sub>2</sub>                | -358.4579626                                            | -358.7329237 ( <i>Z</i> )<br>-358.7238207 ( <i>E</i> )     | 127.4                              |                                | 34.8                                   | 162.2                                  |
|          | OH                             | -229.1724354                                            | -229.4837665 ( <i>E,Z</i> )                                | 31.9                               | 29.3                           | -73.4                                  | -41.5                                  |

### Reference compounds

|                                       |              |
|---------------------------------------|--------------|
| 2-methylpropane                       | -158.5141761 |
| 1-fluoro-2-methylpropane <sup>d</sup> | -257.7820313 |
| 1,1,1-trifluoro-2-methylpropane       | -456.3495341 |
| 2-methylpropanenitrile                | -211.4532096 |
| 2-nitropropane                        | -323.7597095 |
| 2-propanol                            | -194.4329568 |

<sup>a</sup> Calculated at the level B3LYP/6-311++G(2d,2p)//B3LYP/6-311++G(2d,2p). <sup>b</sup> Experimental values obtained from the data of Ref 1. <sup>c</sup> Conformation *sp* on the C–C bond (F near to =O).

<sup>d</sup> Conformation *sc* (F between H and CH<sub>3</sub>).

## Appendix

### Estimation of the resonance contribution to the acidity of acetic acid

This problem was discussed in detail previously and a solution was attempted<sup>9b</sup> using eqn. (12). When the variable groups X in X–OH were not conjugated with the hydroxyl group, the experimental reaction enthalpies  $\Delta_{12}H^\circ$  depended empirically on the inductive constants  $\sigma_I$  or better on a linear combination of  $\sigma_I$  and  $\sigma_\alpha$  (the polarizability constant). When the group CH<sub>3</sub>CO was introduced as substituent X, deviation from the correlation line is a measure of the resonance effect **R** on the acidity. The resonance effect in the acetate anion was estimated similarly.<sup>9b</sup> The inductive contributions were obtained by subtracting from the total experimental effect. These values were related to methanol. Here they were readjusted to 2-propanol, eqn. (13), and are given in Table 2, first line.

We attempted now to estimate the resonance effect on the acidity from a model close to that used for the basicity. To this purpose, eqn. (14) was advanced with X = CH<sub>3</sub>, CN, CF<sub>3</sub> and CH<sub>2</sub>F. (With X = NO<sub>2</sub> no stable molecule could be obtained.) The DFT calculated energies of the alcohols CH<sub>3</sub>CHX–OH and of their anions CH<sub>3</sub>CHX–O<sup>–</sup> are given in Table S2, columns 2 and 3, the isodesmic reaction energies  $\Delta_{14}E$  of eqn. (14) in column 4.

**Table S2** Calculated energies of substituted alcohols CH<sub>3</sub>CHX–OH and of their deprotonated forms<sup>a</sup>

| Substituent<br>X               | CH <sub>3</sub> CHX–OH<br><i>E</i> (DFT) a. u. | CH <sub>3</sub> CHX–O <sup>–</sup><br><i>E</i> (DFT) a. u. | Rel. acidity<br>$\Delta_{14}E$ kJ mol <sup>–1</sup> | $\Delta_{18}E$<br>kJ mol <sup>–1</sup> | $\Delta_{19}E$<br>kJ mol <sup>–1</sup> | $\sigma_I$ |
|--------------------------------|------------------------------------------------|------------------------------------------------------------|-----------------------------------------------------|----------------------------------------|----------------------------------------|------------|
| CH <sub>3</sub>                | –194.4329568                                   | –193.8222911                                               | 0                                                   | 0                                      | 0                                      | 0          |
| CH <sub>2</sub> F <sup>b</sup> | –293.6986081                                   | –293.1028522                                               | –39.2                                               | 5.8                                    | –33.4                                  | 0.10       |
| CF <sub>3</sub>                | –492.2636015                                   | –491.6780098                                               | –65.8                                               | 12.4                                   | –53.5                                  | 0.16       |
| CN                             | –247.3643777                                   | –246.7870279                                               | –87.5                                               | 20.0                                   | –67.5                                  | 0.22       |
| acetic acid                    | –229.1724354                                   | –228.6086418                                               | –123.1                                              | –73.4                                  | –196.5                                 | 0.26       |

<sup>a</sup> Calculated at the level B3LYP/6-311++G(2d,2p)//B3LYP/6-311++G(2d,2p). <sup>b</sup> Conformation *ap* on the C–C bond ( F opposite to OH ).

The plot of  $\Delta_{14}E$  vs the inductive constants  $\sigma_I$  is shown in Fig. S1. The values of  $\sigma_I$  for the complex groups  $-\text{CH}(\text{CH}_3)\text{CN}$ ,  $-\text{CH}(\text{CH}_3)\text{CF}_3$  and  $-\text{CH}(\text{CH}_3)\text{CH}_2\text{F}$  were estimated from the standard values<sup>28</sup> for the groups CN,  $\text{CF}_3$  and  $\text{CH}_2\text{F}$ , respectively, by multiplying by the fall-off factor of 0.46. They are listed in Table S2, last column.

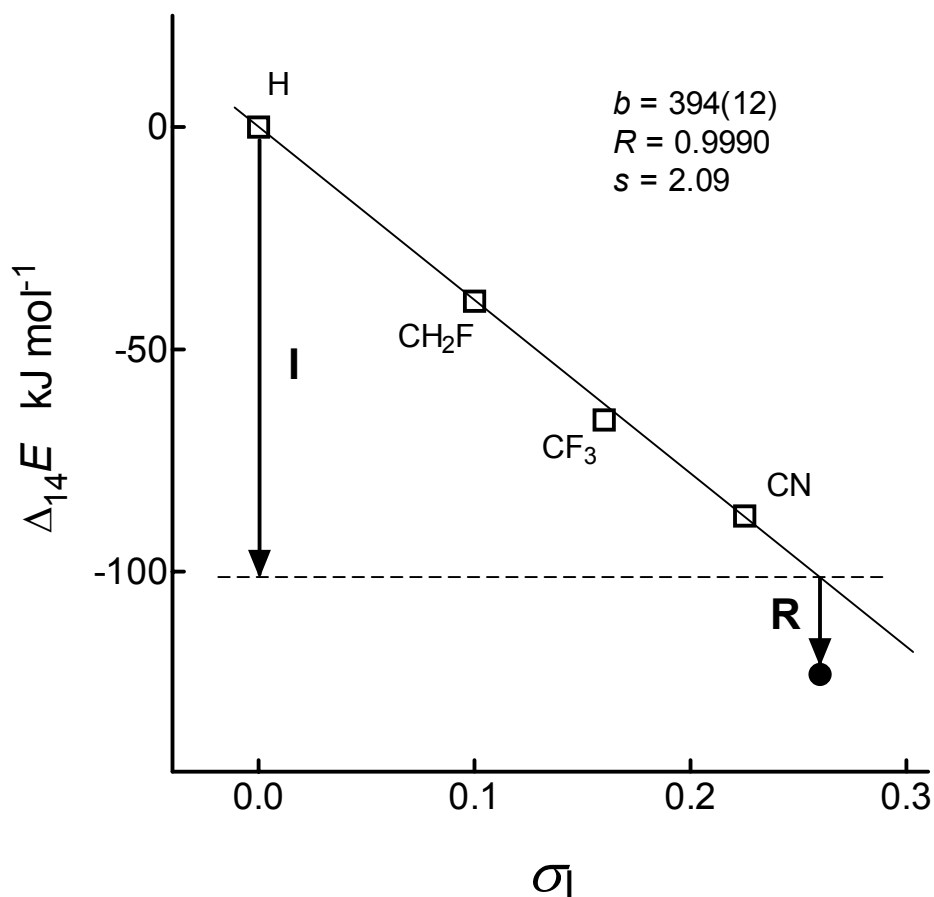

**Fig S1** Plot of the calculated relative acidities [eqn. (14)] of substituted alcohols  $\text{CH}_3\text{CHX}-\text{OH}$  vs. the inductive constant  $\sigma_I$ , the groups X are given at each point. The point  $\bullet$  belongs to acetic acid, the arrows show the assumed contribution of resonance **R** and of the inductive effect **I**.

Bisection into the effects in the anion and in the neutral acid was attempted by means of the isodesmic reactions of eqns (18) and (19).

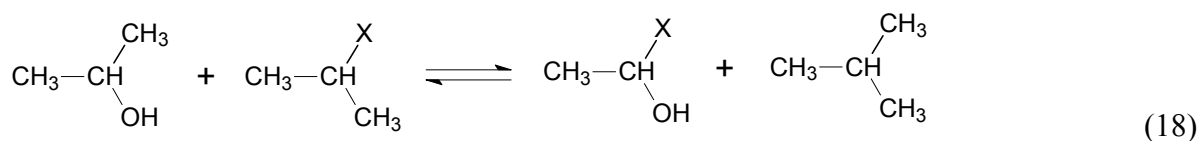

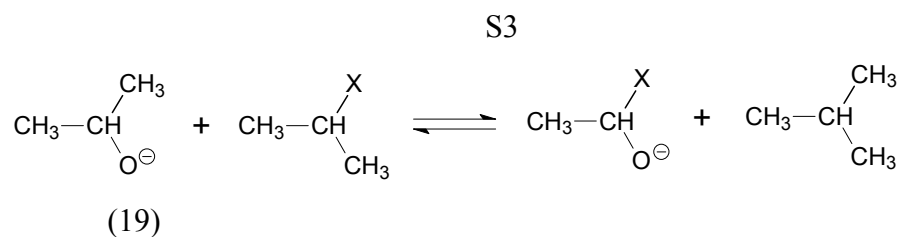

The calculated reaction energies  $\Delta_{18}E$  and  $\Delta_{19}E$  are given in Table S2, columns 5 and 6, respectively. The plot of  $\Delta_{19}E$  vs.  $\sigma_I$  is shown in Fig. S2.

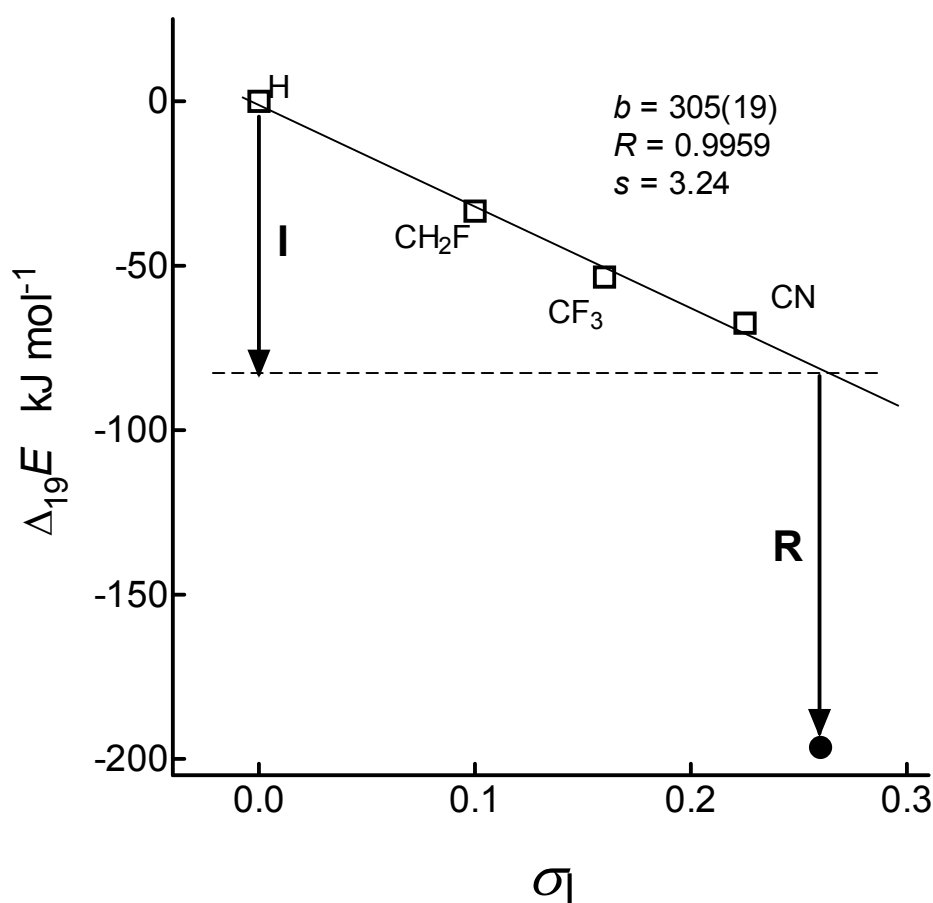

**Fig S2** Plot of the calculated stabilization energies of the anions of substituted alcohols  $\text{CH}_3\text{CHX}-\text{O}^-$  [isodesmic reaction of eqn. (19)] vs. the inductive constant  $\sigma_I$ , the groups X are denoted at each point. The point ● belongs to acetic acid, the arrows show the assumed contribution of resonance **R** and of the inductive effect **I**.

The resulting values **R** and **I** for the acidity are given in Table 2, second line. In our opinion they could be somewhat more reliable than the estimates of the line 1, based on a different model [eqn. (13)]. It is true that Figs S1 and S2 are based on a small number of points, on the other hand the correlations are close and the model is homogeneous.
